# Supplementary material for: Chasing ChEs-MAO B Multi-Targeting 4-Aminomethyl-7-Benzyloxy-2H-Chromen-2-ones
Source: PubMed Central journal article supplement (PMC6943664; doi:10.3390/molecules24244507), 2019-12-09
Supplement: molecules-24-04507-s001.pdf [file molecules-24-04507-s001.pdf]

# Chasing ChEs-MAO B Multi-targeting 4-Aminomethyl-7-Benzyloxy-2H-Chromen-2-ones

Mariagrazia Rullo<sup>a</sup>, Marco Catto<sup>a</sup>, Antonio Carrieri<sup>a</sup>, Modesto de Candia<sup>a</sup>, Cosimo Damiano Altomare<sup>a</sup> and Leonardo Pisani<sup>a,\*</sup>

<sup>a</sup>Department of Pharmacy – Drug Sciences, University of Bari “Aldo Moro”, via Orabona 4, Bari – 70125, Italy

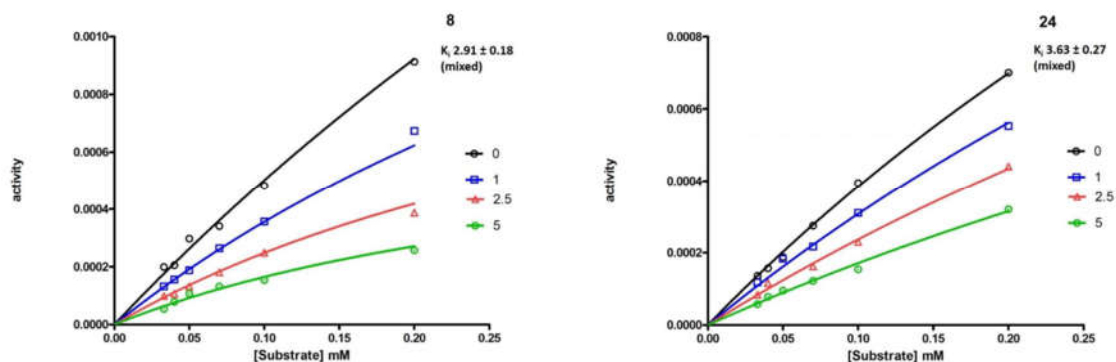

**Figure S1.** eeAChE enzyme kinetics (Michaelis-Menten curves) for compounds **8** (left) and **24** (right).

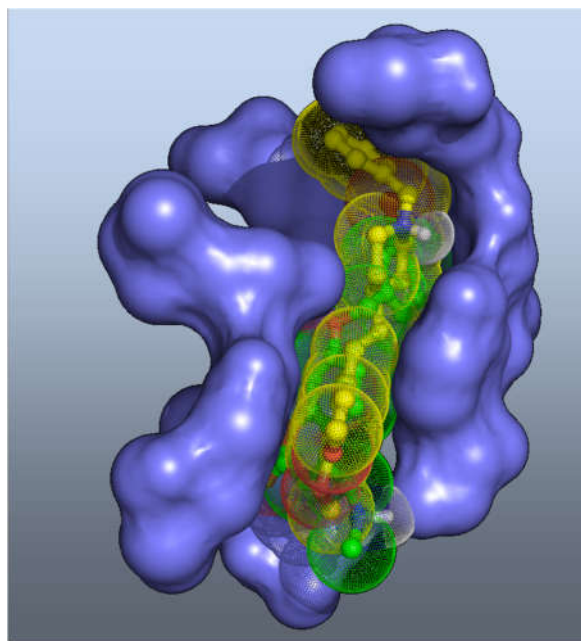

**Figure S2.** Ball and stick model showing the superimposition of the binding poses of donepezil (yellow) and compound **8** (green) within human AChE (PDB code 6OW4).

\* Corresponding author. Tel.: +39-080-544-2803; e-mail: leonardo.pisani@uniba.it

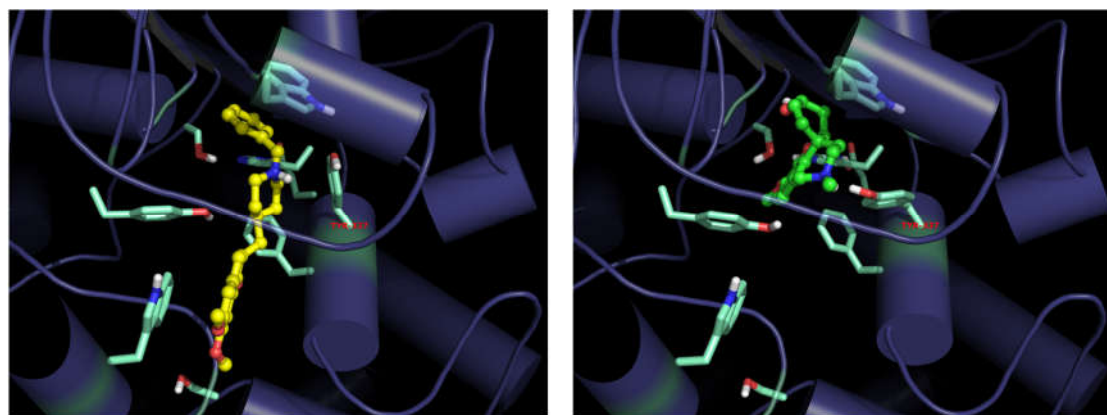

**Figure S3.** Different rotamers for mid-gorge Tyr337 (cyan) in the crystal structures of hAChE complexed with donepezil (yellow; PDB code 6OW4) and galantamine (green; PDB entry 4EY6) employed in docking simulations. Other key residues, showing no shift between the two models, are shown in cyan.

**Table S1.** hAChE docking data for compounds **8**, **24** as compared to donepezil.

| entry            | FEB <sup>a</sup> | Population <sup>b</sup> | Efficacy <sup>c</sup> | CSA <sup>d</sup> |
|------------------|------------------|-------------------------|-----------------------|------------------|
| <b>8</b>         | -11.62           | 59/250                  | 0.505                 | 352.99           |
| <b>24</b>        | -12.71           | 26/250                  | 0.489                 | 393.89           |
| <b>donepezil</b> | -10.86           | 55/250                  | 0.388                 | 442.44           |

<sup>a</sup>Free energy of binding (kcal/mol) as estimated by the AutoDock scoring function.

<sup>b</sup>Frequency of the selected cluster.

<sup>c</sup>Ligand efficacy calculated measured as the absolute FEB value divided by the number of heavy atoms.

<sup>d</sup>Contact surface area in Å<sup>2</sup>.
